# Aquila\_stLFR: assembly based variant calling package for stLFR and hybrid assembly for linked-reads

Xin Zhou<sup>1,\*</sup>, Lu Zhang<sup>2,3</sup>, Xiaodong Fang<sup>4</sup>, Yichen Liu<sup>5</sup>, David L. Dill<sup>1</sup>,  
and Arend Sidow<sup>2,6,\*</sup>

<sup>1</sup>Department of Computer Science, Stanford University,  
Stanford, California 94305, USA

<sup>2</sup>Department of Pathology, Stanford University School of Medicine,  
Stanford, California 94305, USA

<sup>3</sup>Department of Computer Science, Hong Kong Baptist University  
<sup>4</sup>BGI Tech, BGI Genomics, Shenzhen, China

<sup>5</sup>School of information and communication engineering,  
University of Electronic Science and Technology of China, China

<sup>6</sup>Department of Genetics, Stanford University School of Medicine,  
Stanford, California 94305, USA

## Abstract

Human diploid genome assembly enables identifying maternal and paternal genetic variations. Algorithms based on 10x linked-read sequencing have been developed for de novo assembly, variant calling and haplotyping. Another linked-read technology, single tube long fragment read (stLFR), has recently provided a low-cost single tube solution that can enable long fragment data. However, no existing software is available for human diploid assembly and variant calls. We develop Aquila\_stLFR to adapt to the key characteristics of stLFR. Aquila\_stLFR assembles near perfect diploid assembled contigs, and the assembly-based variant calling shows that Aquila\_stLFR detects large numbers of structural variants which were not easily spanned by Illumina short-reads. Furthermore, the hybrid assembly mode Aquila\_hybrid allows a hybrid assembly based on both stLFR and 10x linked-reads libraries, demonstrating that these two technologies can always be complementary to each other for assembly to improve contiguity and the variants detection, regardless of assembly quality of the library itself from single sequencing technology. The overlapped structural variants (SVs) from two independent sequencing data of the same individual, and the SVs from hybrid assemblies provide us a high-confidence profile to study them.

**Availability:** Source code and documentation are available on [https://github.com/maiziex/Aquila\\_stLFR](https://github.com/maiziex/Aquila_stLFR).

## 1 Introduction

Generating a precise and customized diploid human genome for each individual will be a breakthrough for uncovering the fundamental relationship between genotype and phenotype, and will

---

\*Corresponding Author. Email: [xzhou15@cs.stanford.edu](mailto:xzhou15@cs.stanford.edu)

have far reaching health implications, such as cancer-related variants, and risk for genetic disease [1]. Illumina short-read sequencing has had a major influence on human genetic studies. Over 100,000 individual personal genomes have been sequenced, allowing detection of unique variations in personal genomes that cause diseases [2]. Large-scale genome studies, such as the 1000 Genome Project and the 10k UK Genome Project, have relied on reference-based assembly approaches and have made great progress in uncovering genomic differences among individuals, but identifying individual variations in highly variable or repetitive regions has been less accurate due to limitations of the resequencing technology [3]. Structural variants (SVs) are also challenging to detect by alignment-based variant calling algorithms.

De novo assembly is a better alternative for building a precise diploid genome on a large scale. It has been widely used for next-generation sequencing (NGS) data, single nucleotide polymorphisms and small variants that can be detected straightforwardly by short reads [4, 5, 6]. Assembly-based structural variants detection offers a powerful approach to identify SVs [7, 8, 9]. However, the breakpoints of large variants (50bp) are less likely to be spanned through short reads. Third generation sequencing data (PacBio and NanoPore) use long reads can resolve this problem, but they introduce high sequencing errors and great cost for performing whole genome sequencing (WGS) at large scale [10, 8].

Recently developed 10x linked-reads and single tube long fragment read (stLFR) sequencing technologies offer cost-effective solutions for large-scale “perfect genome” assembly [11, 12, 13]. Compared to next generation sequencing data and other third sequencing technologies, these two linked-reads methods provide both low sequencing error and long-range contiguity. The long-range information of 10x linked-reads from short-read sequencing data allows detection of structural variants, *de novo* mutations, and haplotype phasing much easier and accurately [14, 15]. stLFR enables co-barcoding of over 8 million 20 – 300kb genomic DNA fragments. Long-range information from stLFR enables phasing variants efficiently and results in long phase block N50 (34MB for NA12878, Wang2019).

The utility of these linked-reads sequencing data in generating a diploid assembly and detecting variants from assembly require development of new algorithms. The current state-of-the-art algorithm, Supernova, was introduced by 10x Genomics to assemble 10x linked-reads sequencing data, especially for the standard library with suggested sequencing coverage (mean fragment length 40kb, optimal coverage: 37X - 56X) [16]. Its performance had limitations in both assembly quality and in identifying assembly-based variant calls [17, 18, 19]. Aquila was developed recently to solve this problem for 10x linked-reads, generating perfect diploid assembly with long contiguity and achieving variants detection from assemblies with great sensitivity and accuracy in all types of variants [19].

So far, there is no available assembly or assembly-based variants-calling algorithms for stLFR, or even a universal algorithm for both stLFR and 10x linked-reads. Here, we develop Aquila.stLFR, which extends Aquila to adapt to the key characteristics of stLFR, and further introduce a hybrid assembly mode “Aquila.hybrid” to allow assembly combining both stLFR and 10x linked-reads. Aquila.stLFR and Aquila.hybrid integrate long-range phasing information to refine reads for local assembly in small phased chunks of both haplotypes, and then concatenate them basing on a

high-confidence profile, to achieve more precise and phased contiguous sequences, diploid contigs. These diploid assembled contigs allow us to detect all types of variants through simple pairwise alignments and comparisons.

## 2 Methods

Aquila\_stLFR is a reference-assisted local *de novo* assembly pipeline (Figure 1). The reference is used to globally allocate long fragments into genomic regions, and local assembly is performed within small phased chunks for both haplotypes. The input files for Aquila\_stLFR consist of a FASTQ file with raw paired reads, a BAM file and a VCF file (by FreeBayes, [20]). To generate the BAM file through bwa-mem ([21]), each read header of FASTQ file contains the barcode sequence, starting with “BX:Z:” (for instance, “BX:Z:540\_839\_548” where 540\_839\_548 is the barcode - check details in Github). This way each read in the BAM file also includes the field “BX:Z:” for Aquila\_stLFR to reconstruct long fragment reads (LFRs) (Figure S1 and S2). For LFR technology, co-barcoded reads can form one individual LFR. Aquila\_stLFR reconstructs all LFRs based on this concept. However, barcode deconvolution is still necessary for some LFRs since one barcode per LFR concept is not ideally implemented in real library preparation. There is a boundary threshold to differentiate two LFRs with the same barcode when the distance between two successive reads with the same barcode is larger than 50kb.

### 2.1 Haplotyping algorithm for LFRs

In the first step, Aquila\_stLFR applies a recursive clustering algorithm to perform haplotyping reconstructed LFRs [19]. After reconstructing all LFRs, Aquila\_stLFR assigns the alleles of heterozygous SNPs to each LFR by scanning the reads belonging to each LFR and comparing to the VCF file generated by FreeBayes. At a heterozygous locus 0 is the reference allele and 1 is the alternate allele. Ideally, there should be two clusters for each pair of heterozygous SNPs: one cluster with all LFRs supporting the maternal haplotype (for an instance, “01”), and another cluster with all LFRs supporting the paternal haplotype (the complementary format, “10”). However, Aquila\_stLFR could also detect two other clusters with fewer LFRs supporting the wrong haplotypes (“00” or “11”) that are caused by sequencing error. Aquila\_stLFR uses a Bayesian probability model to rule out the two clusters with wrong haplotypes for each pair of heterozygous SNPs [19]. After excluding all the clusters with wrong haplotypes, the two remaining clusters form the correct maternal and paternal haplotypes. Aquila\_stLFR then recursively aggregates small clusters into big ones for each haplotype relying on a supporting threshold. For instance, two clusters are merged if the number of molecules supporting the same haplotype exceeds this threshold in both of them. This threshold is set to 3 by default, corresponding to a merging error percentage  $\leq ((1 - p_1)(1 - p_2))^3$  (for each pair of variants, if each variant matched the true variant with probability  $p_1$  and  $p_2$ , respectively). Aquila\_stLFR performs clustering recursively until no more clusters can be merged based on the supporting threshold. To further extend the phase blocks, Aquila\_stLFR similarly performs recursive clustering when two phase blocks have a number of overlapping variants greater than a pre-defined threshold. The threshold is set to 5 by default so that the merging error due to sequencing error  $p$  is  $\leq p^5$ . When no more phase blocks can be merged the process has converged. Eventually, The LFRs within the clusters are assigned to the maternal or paternal haplotypes of the relevant phase blocks.

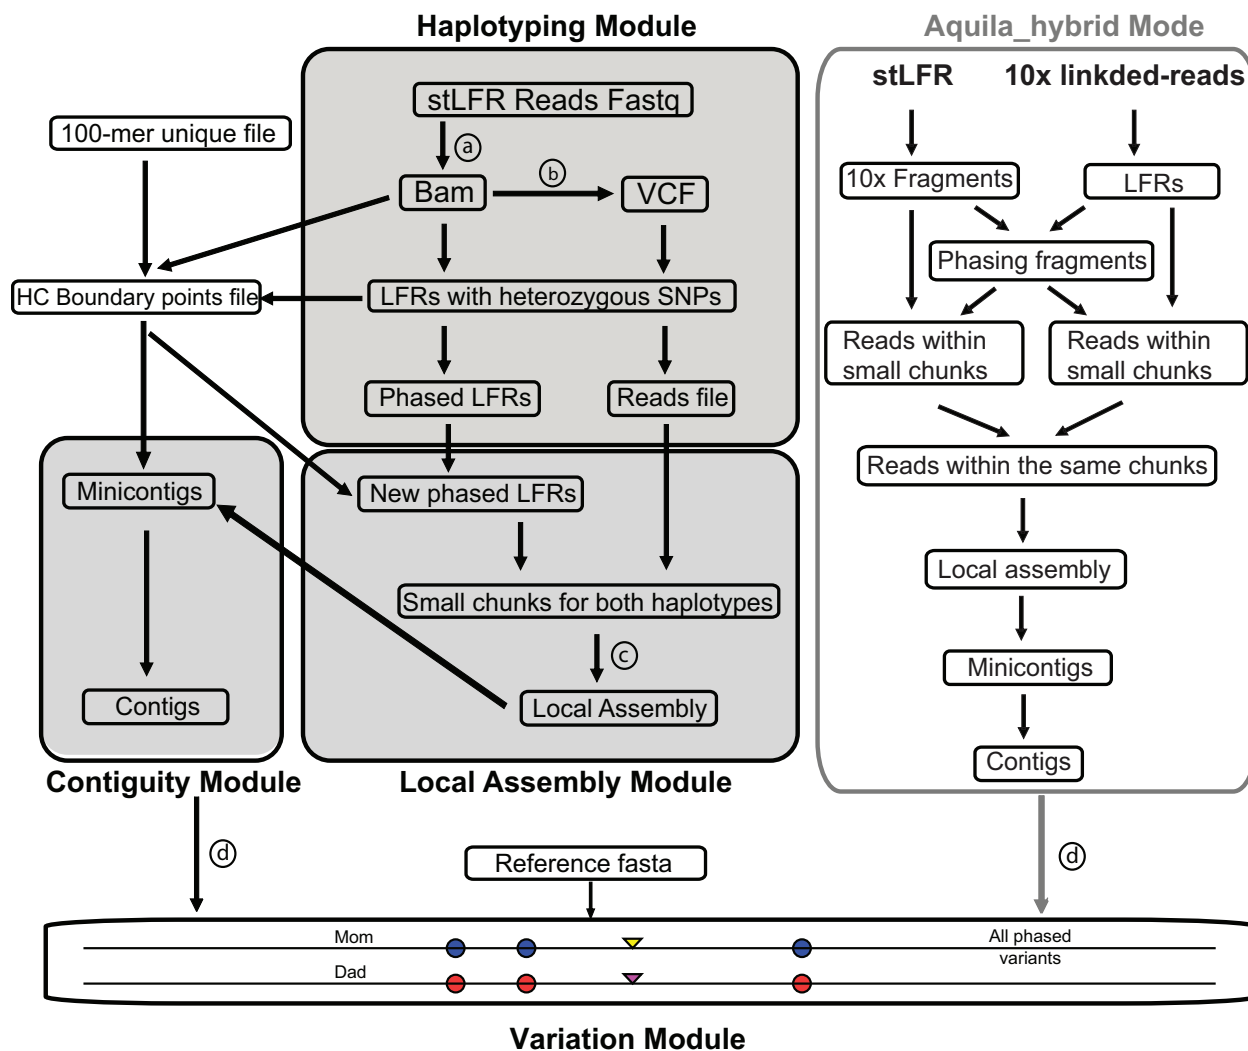

Figure 1: Pipeline of Aquila\_stLFR, a reference-assisted diploid-resolved genome assembly for stLFR. Input files: FASTQ file, BAM file and VCF file. a: Bwa-mem; b: FreeBayes; c: SPAdes; d: minimap2 and paftools.

## 2.2 Linear local assembly

The average phase block length for the library used in this paper is approximately  $282kb$ , and the maximum phase block length achieved,  $104Mb$ . Instead of directly assembling reads within big phase blocks for both haplotypes, Aquila\_stLFR turns the global assembly problem into a linear local assembly problem. It cuts large phase blocks ( $\geq 200kb$  for default) into small chunks ( $100kb$  by default) based on a high-confidence boundary point profile. This profile consists of human genomic regions which are covered by sufficient reads, and do not overlap with repetitive sequences. The LFRs are then allocated into small chunks for both haplotypes. Some LFRs could be allocated to more than one chunk, depending on their total length. However, Aquila\_stLFR only extracts

the corresponding reads from the LFRs into each chunk based on the range of the reads within each LFR and the associated chunk. Finally, Aquila\_stLFR applies local assembly for each small chunk of both haplotypes by SPAdes [22]. Local assembly within small chunks avoids ambiguous reads being assembled in a global scale, and it is not computationally intensive. The total assembly time is approximately  $N_{total} * T_{onechunk}$  ( $N_{total}$ : total number of small chunks,  $T_{onechunk}$ : average assembly time for one small chunk). Eventually, minicontigs for both haplotypes are assembled in small chunks. To achieve large contiguity, Aquila\_stLFR iteratively concatenates minicontigs into final contigs based on the high-confidence boundary point profile for both haplotypes. We use QUASt (Gurevich et al., 2013) to generate various assembly metrics such as N50 and NA50. `-extensive-mis-size 1000` is applied as the lower threshold of the relocation size.

### 2.3 High-confidence boundary point profile

To find genomic regions not involving repetitive sequences, Aquila\_stLFR re-implements the Umap from hoffman mappability [23] to allow it assemble most of diploid species, which have high quality references. It identifies the mappability of a genome for a given read length  $k$  ( $k = 100$  by default). It involves three essential steps. Firstly, it generates all possible k-mers from the reference. Secondly, it uses Bowtie [24] to map these unique k-mers to the reference. Thirdly, it records the positions of all k-mers, which align to only one region in the reference.

### 2.4 Assembly based variants calling

Minimap2 [25] and paftools (<https://github.com/lh3/minimap2/tree/master/misc>) are integrated into Aquila\_stLFR and applied to call variants from haploid assemblies. A pairwise comparison between breakpoints of variants from two haploid assemblies is then performed to detect all types of heterozygous and homozygous variants. To evaluate our diploid assembly, we generate SNPs, small indels ( $< 50bp$ ) and SV ( $\geq 50bp$ ). To achieve that, heterozygous variants are defined if one haploid assembly contains alternate allele(s) and the other haploid assembly contains reference allele(s). Homozygous variants are defined if both haploid assemblies contain alternate allele(s). For compound indel/SV, we split them into two heterozygous variants. Check “`--all_regions_flag=1`” for “`Aquila_stLFR_assembly_based_variants_call.py`” in github to perform these analyses.

### 2.5 Hybrid assembly for stLFR and 10x linked-reads

10x linked-reads sequencing creates millions of partitions in a microfluid system and within each partition, around 10 long DNA fragments ( $10kb - 100kb$ ) share the same unique barcode. stLFR typically creates over 1.8 billion unique barcoded beads, and uses 10 - 50 million of them to capture 10 - 100 million long DNA fragments in a single tube. The greatest amount of sub-fragments from each long DNA fragments are co-barcoded by a unique barcode. To combine stLFR and 10x linked-reads, we introduce a “Aquila\_hybrid” mode, which applies an analogous concept to reconstruct long DNA fragments and generate the same data structure for long fragments of both technologies (Figure 1). Aquila\_hybrid performs efficient haplotyping for all the fragments in the next step. Based on the phasing information, if the phase block length is beyond a threshold ( $200kb$ ), Aquila\_hybrid cuts it into multiple small chunks, which is the same as that for single technology. Aquila\_hybrid then extracts reads from each library independently for each phased chunk of both haplotypes, and then merges reads from the same chunks for both libraries. Linear

| Sequenced Library | Sequencing Technology | Sample id | Raw coverage (X) | $C_F$ | $C_R$ | $\mu_{FL}$ (kb) |
|-------------------|-----------------------|-----------|------------------|-------|-------|-----------------|
| L1                | stLFR                 | NA12878   | 98               | 238   | 0.35  | 25.7            |
| L2                | stLFR                 | NA12878   | 98               | 238   | 0.35  | 25.7            |
| L1                | 10x                   | NA12878   | 103              | 123   | 0.41  | 79.0            |
| L3                | 10x                   | NA12878   | 106              | 958   | 0.07  | 99.2            |

Table 1: Parameters of stLFR library (L1, L2) and 10x linked-read library (L1, L3) for NA12878.  $C_F$ : fragment physical coverage;  $C_R$ : read coverage per fragment.  $\mu_{FL}$ : mean fragment length.

local assembly can be performed within the small phased chunks to assemble mini-contigs for both haplotypes. Finally, Aquila\_hybrid achieves contiguity in a large scale based on the high-confidence boundary points profile.

## 2.6 Barcode “0\_0\_0”: no specificity

By reconstructing LFRs, we detect reads with barcode “0\_0\_0” can span a whole chromosome which means they have no LFR specificity. We did two experiments to investigate the influence of reads with barcode “0\_0\_0”, and found involvement of these reads would increase diploid ratio over 2 by sacrificing contiguity. Aquila\_stLFR and Aquila\_hybrid then remove reads with barcode “0\_0\_0” for local assembly in both haplotypes.

## 3 Results

### 3.1 Characteristics of Aquila\_stLFR and Aquila\_hybrid assemblies

Two stLFR libraries (L1\_stLFR and L2\_stLFR, [26]), and two 10x linked-reads libraries (L1\_10x and L3\_10x, [19]) are used in this study, obtained from NA12878 (Table 1). Previous studies have shown several parameters from barcoded linked-reads libraries having influence on human diploid assembly:  $C_F$ : average physical coverage of the genome by long DNA Fragments;  $C_R$ : average coverage of short reads per fragment;  $N_{F/P}$ : number of fragments per partition;  $\mu_{FL}$ : average unweighted DNA fragment length. The optimal physical coverage  $C_F$  is between 332X and 823X for assembly quality, the optimal length-weighted fragment length ( $W_{\mu_{FL}}$ ) is around 50 - 150kb, and  $N_{F/P}$  has no significant influence [17].

Here, it shows the contig N50 values for both stLFR libraries are approximately 26kb, the diploid ratio 94%, and the genome fraction 90% (Table 2). The contig contiguity is not comparable to that of 10x linked-reads libraries by Aquila ([19]) or Supernova ([16]). One limitation for stLFR libraries is that the short-reads used by stLFR are only 100bp, which only accounts for 66.7% of short reads length (150bp) by 10x linked-read libraries. Another limitation is the average fragment length ( $\mu_{FL}$ ) is only 20kb for stLFR libraries. On the other side, even though stLFR sequencing technology allows much more barcodes to achieve one barcode per long fragment, the small  $N_{F/P}$  does not compensate the assembly quality.

Aquila\_stLFR uses the hybrid assembly mode “Aquila\_hybrid”, to assemble both stLFR and 10x

| NA12878                | Contig N50<br>(bp) | Contig NA50<br>(bp) | Diploid Fraction<br>(%) | Genome Fraction<br>(%) |
|------------------------|--------------------|---------------------|-------------------------|------------------------|
| <b>L1_stLFR</b>        | 26,682             | 25,723              | 94.0                    | 90.77                  |
| <b>L2_stLFR</b>        | 25,566             | 24,658              | 93.8                    | 89.51                  |
| <b>L1_10x</b>          | 34,759             | 31,645              | 98.1                    | 95.45                  |
| <b>L3_10x</b>          | 120,963            | 116,438             | 98.7                    | 96.17                  |
| <b>L1_10x+L2_stLFR</b> | 44,482             | 40,703              | 98.5                    | 91.85                  |
| <b>L3_10x+L2_stLFR</b> | 142,234            | 136,274             | 98.8                    | 95.39                  |

Table 2: Assembly metrics of four libraries for NA12878. Genome Fraction, percentage of reference genome that is covered by the assembly. Diploid Fraction, percentage of Genome Fraction that is covered by exactly two parental contigs. L1\_10x+L2\_stLFR describes performance for a hybrid combination of the data from L1 (linked-reads) and L2 (stLFR), L3\_10x+L2\_stLFR describes performance for a hybrid combination of the data from L3 (linked-reads) and L2 (stLFR).

linked-read libraries. The previous study shows two 10x linked-reads libraries with good comparable assembly quality, can be combined to further improve contiguity ([19]). Here, we use the stLFR library L2\_stLFR, to perform a hybrid assembly with 10x link-reads library L1\_10x and L3\_10x, respectively. Library L1\_10x has contig N50 35kb, L3\_10x has contig N50 121kb, and the combined L1+L3 (10x) can not achieve a better N50 contiguity since the assembly quality for two linked-read libraries are not comparable ([19]). Here, our hybrid assembly results show the contig N50 for hybrid library substantially increase by 74.0% - 456.3% and 17.6% - 28.0% , compared to that of stLFR, and 10x linked-reads, respectively (Table 2). It indicates that stLFR and 10x linked-reads can always be used in a complementary fashion for assembly to improve contiguity, regardless of the assembly quality of the single library itself.

### 3.2 Assembly-based detection of SNPs and small indels

For assembly-based variant calling, 94% diploid ratio guarantees the correct zygosity of the variants, and allow us to detect variants in diploid assemblies (see Methods). The total numbers of assembly-based SNP calls are 3,882,250 (L1\_stLFR) and 3,882,323 (L2\_stLFR), compared to the total numbers of reference-based calls of 3,860,161 (L1\_stLFR) and 3,860,124 (L1\_stLFR). Numbers of heterozygotes or homozygotes are also comparable between the two approaches (Table S1). Compared to the GIAB SNPs callset v3.3.2 ([27]), The recall and precision of assembly-based SNPs is around 94% and 91%, respectively (Table 3). Compared to the GIAB small indel callset v3.3.2, Aquila\_stLFR produces considerably more calls (e.g., 887,320 in L2 vs GiaB's 531,228; Table 3 and S2). The size distribution of Aquila\_stLFR's small indels matches the one from GIAB very closely, exhibiting the same 2bp periodicity such that insertions or deletions of an even length are more common than those that are one base longer or shorter (Figure S3). The recall of small indels for both stLFR libraries is approximately 90%, and the precision is approximately 94% (Table 3). Furthermore, we can see that the performances of hybrid assemblies for both SNP and indels are increased comparing to that of single stLFR/10x library. This is consistent with the increased assembly contiguity by hybrid assemblies.

| SNP             |           | True Positives | False Negatives | False Positives | Genotype Mismatches | Total number | Precision | Recall   | F1       |
|-----------------|-----------|----------------|-----------------|-----------------|---------------------|--------------|-----------|----------|----------|
| L1_stLFR        | Aquila    | 2,851,008      | 191,775         | 292,017         | 22,232              | 3,882,250    | 0.907189  | 0.936974 | 0.921841 |
|                 | FreeBayes | 3,019,928      | 22,855          | 35,583          | 4,607               | 4,158,048    | 0.988362  | 0.992489 | 0.990421 |
| L2_stLFR        | Aquila    | 2,847,211      | 195,572         | 297,034         | 22,339              | 3,882,323    | 0.905631  | 0.935726 | 0.920433 |
|                 | FreeBayes | 3,019,928      | 22,855          | 35,568          | 4,612               | 4,157,982    | 0.988367  | 0.992489 | 0.990424 |
| L1_10x+L2_stLFR | Aquila    | 2,889,402      | 153,375         | 108,623         | 7,126               | 3,788,821    | 0.963807  | 0.949594 | 0.956648 |
| L3_10x+L2_stLFR | Aquila    | 3,006,002      | 36,781          | 103,758         | 5,000               | 3,931,076    | 0.966673  | 0.987912 | 0.977177 |

  

| INDEL           |           | True Positives | False Negatives | False Positives | Genotype Mismatches | Total number | Precision | Recall   | F1       |
|-----------------|-----------|----------------|-----------------|-----------------|---------------------|--------------|-----------|----------|----------|
| L1_stLFR        | Aquila    | 478,057        | 53,325          | 31,164          | 26,003              | 886,681      | 0.938801  | 0.899648 | 0.918808 |
|                 | FreeBayes | 427,285        | 72,413          | 30,666          | 25,904              | 829,341      | 0.934220  | 0.855086 | 0.892903 |
| L2_stLFR        | Aquila    | 477,939        | 53,443          | 31,898          | 38,383              | 887,320      | 0.937435  | 0.899426 | 0.918037 |
|                 | FreeBayes | 427,283        | 72,415          | 30,669          | 25,906              | 829,342      | 0.934213  | 0.855082 | 0.892898 |
| L1_10x+L2_stLFR | Aquila    | 478,305        | 53,077          | 41,560          | 27,313              | 935,953      | 0.920056  | 0.900115 | 0.909976 |
| L3_10x+L2_stLFR | Aquila    | 500,104        | 31,278          | 28,148          | 9,743               | 945,772      | 0.946715  | 0.941138 | 0.943918 |

Table 3: Comparison of SNP/indel of different pipelines with Aquila\_stLFR. Variants were called from four different assemblies and compared to GIAB NISTv3.3.2. Variant counts and performance scores were generated by RTGtools/hap.py an Illumina haplotype comparison/benchmarking tool.

Our benchmarks show the assembly-based small indels calling by Aquila\_stLFR outperforms alignment-based algorithm (eg. FreeBayes), even though assembly-based SNPs calling is not close to perfect like FreeBayes. To compensate SNPs calling, Aquila\_stLFR indeed integrates all the SNP calls from alignment-based algorithms (eg. FreeBayes) in the variant calling module, which are missed by assemblies.

### 3.3 Assembly-based detection of structural variants

From diploid assemblies, we detect over 28,000 SVs ( $\geq 50bp$ ) in both libraries (eg. 25,837 deletions and 3,102 insertions for L1\_stLFR, Table 4), and the size distribution of them indicate that stLFR assemblies achieve a wide range of SVs (Figure S4).

SV calls from two independent sequencing technologies could generate high-confidence SVs. We compare the SV calls among stLFR, 10x linked-reads, and hybrid assemblies. The overlapped SVs between two libraries are defined if their breakpoints, reference and alternate allele(s) are exactly the same (no soft threshold). Our comparison results show that 27% SVs from stLFR and 33% SVs from 10x linked-reads are overlapped, which give us high confidence that these 7,809 overlapped SV calls are true positives (Table 5). We could also see that the SV calls by hybrid assembly have a larger overlap with that of 10x assembly than stLFR assembly. We also see similar trend for small indels (Table S3).

In general, We also note that the fraction of variants that are heterozygous varies over a narrow range across all types and sizes of detected variation (Figure S5), revealing no obvious biases.



| Deletion               | Homo  | Hetero | Total  | Insertion              | Homo | Hetero | Total  |
|------------------------|-------|--------|--------|------------------------|------|--------|--------|
| <b>L1_stLFR</b>        | 2,715 | 23,122 | 25,837 | <b>L1_stLFR</b>        | 436  | 2,666  | 3,102  |
| <b>L2_stLFR</b>        | 2,675 | 23,516 | 26,191 | <b>L2_stLFR</b>        | 431  | 2,689  | 3,120  |
| <b>L1_10x+L2_stLFR</b> | 2,602 | 13,233 | 15,835 | <b>L1_10x+L2_stLFR</b> | 616  | 13,940 | 14,556 |
| <b>L3_10x+L2_stLFR</b> | 3,554 | 13,587 | 17,141 | <b>L3_10x+L2_stLFR</b> | 808  | 4,892  | 5,700  |

Table 4: Different types of SVs ( $\geq 50$ bp) for four assemblies. Deletions: homozygous ones, heterozygous ones and total number. Insertions: homozygous ones, heterozygous ones and total number.

|                        | DEL( $\geq 50$ ) |         |        | INS( $\geq 50$ ) |         |        |
|------------------------|------------------|---------|--------|------------------|---------|--------|
|                        | Total            | Overlap | Unique | Total            | Overlap | Unique |
| <b>L2_stLFR</b>        | 26,191           |         | 19,844 | 3,120            |         | 1,658  |
| <b>L3_10x</b>          | 17,806           | 6,347   | 11,459 | 6,057            | 1,462   | 4,595  |
| <b>L3_10x</b>          | 17,806           |         | 4,354  | 6,057            |         | 1,666  |
| <b>L3_10x+L2_stLFR</b> | 17,141           | 13,452  | 3,689  | 5,700            | 4,391   | 1,309  |
| <b>L2_stLFR</b>        | 26,191           |         | 19,726 | 3,120            |         | 1,593  |
| <b>L3_10x+L2_stLFR</b> | 17,141           | 6,465   | 10,676 | 5,700            | 1,527   | 4,173  |

Table 5: Overlapped and unique number of SVs ( $\geq 50$ bp) in all regions between L2\_stLFR, L3\_10x, and L3\_10x+L2\_stLFR. For overlapped SVs between two libraries, the break points and reference and alternate alleles are the same.

## 4 Discussion

stLFR sequencing technology provides long range information through barcoded reads clouds. To take advantage of this long range information, Aquila\_stLFR globally performs haplotyping long LFRs into two haplotypes, and then allocates short reads into small phased chunks to do local assembly. The key concept of Aquila\_stLFR is that it guarantees a complete diploid assembly, which allows us to further detect all types of variants, especially for small indels and large SVs in diploid assemblies. For barcoded linked-reads technology, parameters like  $C_F$ ,  $C_R$ ,  $\mu_{FL}$  are essential for assembly quality. 10x Genomics recommends the standard library (mean fragment length  $\mu_{FL} \sim 40$ kb, optimal coverage: 37X - 56X), to assemble 10x linked-reads sequencing data ([16]). Recent studies with different customized link-reads libraries show that the optimal physical coverage  $C_F$  is between 332X and 823X and assembly quality could further improve by even higher  $C_F$  if the corresponding  $C_R$  is increased. They also suggest that the optimal length-weighted fragment length ( $W_{\mu_{FL}}$ ) is around 50 - 150kb ([17],[18]). We find all stLFR libraries have a similar configuration of these three parameters ( $C_F = 238X$ ,  $C_R = 0.35$ ,  $\mu_{FL} = 25.7kb$ ). This indicates that the low  $\mu_{FL}$  is one key factor causing the lower contiguity of stLFR assemblies comparing with that of 10x linked-reads assemblies. Furthermore, stLFR libraries use 100bp paired short reads which cause limitation for local assembly compared to 150bp paired short reads used by 10x link-reads. We believe this study can provide a guideline for future stLFR libraries preparation to achieve significant improvement in assembly and the downstream analysis.

Beyond the alignment-based variant detection, assembly-based variant detection provides us an indispensable alternative to study all types of variants, especially small indels and large SVs. To-

day, different types of sequencing technologies allow us to study variations for the same individual independently, and the further combination of these different sequencing data gives us power to improve our work qualities. Aquila\_stLFR can detect a large range of SVs from stLFR libraries, and its hybrid assembly mode can efficiently assemble both stLFR and 10x link-reads sequencing data. The overlapped SVs between these two linked-reads technologies, and the SVs from their hybrid assemblies provide us a high-confidence profile to study SVs.

## 5 Acknowledgements

This research was supported by the Joint Initiative for Metrology in Biology (JIMB; National Institute of Standards and Technology).

## References

- [1] Tewhey, R., Bansal, V., Torkamani, A., Topol, E. J. & Schork, N. J. The importance of phase information for human genomics (2011).
- [2] Lunshof, J. e. a. Personal genomes in progress: from the human genome project to the personal genome project. *Dialogues Clin Neurosci* **12**, 47–60 (2010).
- [3] Sohn, J. I. & Nam, J. W. The present and future of de novo whole-genome assembly. *Briefings in Bioinformatics* (2018).
- [4] Mills, R. E. *et al.* Mapping copy number variation by population-scale genome sequencing. *Nature* (2011).
- [5] Sudmant, P. H. *et al.* An integrated map of structural variation in 2,504 human genomes. *Nature* (2015).
- [6] Zarrei, M., MacDonald, J. R., Merico, D. & Scherer, S. W. A copy number variation map of the human genome (2015).
- [7] Wala, J. A. *et al.* SvABA: Genome-wide detection of structural variants and indels by local assembly. *Genome Research* (2018).
- [8] Fan, X., Chaisson, M., Nakhleh, L. & Chen, K. HySA: A hybrid structural variant assembly approach using next-generation and single-molecule sequencing technologies. *Genome Research* (2017).
- [9] Nattestad, M. & Schatz, M. C. Assemblytics: A web analytics tool for the detection of variants from an assembly. *Bioinformatics* (2016).
- [10] Rhoads, A. & Au, K. F. PacBio Sequencing and Its Applications (2015).
- [11] Peters, B., Liu, J. & Drmanac, R. Co-barcoded sequence reads from long dna fragments: a cost-effective solution for perfect genome sequencing. *Front Genet* **5**, 466 (2014).
- [12] Zheng, G. e. a. Haplotyping germline and cancer genomes with high-throughput linked-read sequencing. *Nat Biotechnol* **34**, 303–311 (2016).

- [13] McElwain, M. A. e. a. Long fragment read (lfr) technology: Cost-effective, high-quality genome-wide molecular haplotyping. *Methods Mol. Biol.* **1551**, 191–205 (2017).
- [14] Zheng, G. X. *et al.* Haplotyping germline and cancer genomes with high-throughput linked-read sequencing. *Nature Biotechnology* (2016).
- [15] Zhou, X., Batzoglou, S., Sidow, A. & Zhang, L. HAPDeNovo: A haplotype-based approach for filtering and phasing de novo mutations in linked read sequencing data. *BMC Genomics* (2018).
- [16] Weisenfeld, I. e. a. Direct determination of diploid genome sequences. *Genome research* **5**, 757–767 (2017).
- [17] Zhang, L., Zhou, X., Weng, Z. & Sidow, A. Assessment of human diploid genome assembly with 10x Linked-Reads data (2019).
- [18] Zhang, L., Zhou, X., ziming Weng & Sidow, A. De novo diploid genome assembly for genome-wide structural variant detection. *bioRxiv* (2019).
- [19] Zhou, X. e. a. Aquila: diploid personal genome assembly and comprehensive variant detection based on linked reads (2019). URL <https://www.biorxiv.org/content/biorxiv/early/2019/06/05/660605.full.pdf>.
- [20] Garrison, E. & Marth, G. Haplotype-based variant detection from short-read sequencing (2012). URL <https://arxiv.org/abs/1207.3907>.
- [21] Li, H. & Durbin, R. Fast and accurate short read alignment with burrows-wheeler transform. *Bioinformatics* **25**, 1754–1760 (2009).
- [22] Bankevich, A. e. a. Spades: A new genome assembly algorithm and its applications to single-cell sequencing. *Journal of Computational Biology* **19**, 455–477 (2012).
- [23] Karimzadeh, M., Ernst, C., Kundaje, A. & Hoffman, M. M. Umap and Bimap: Quantifying genome and methylome mappability. *Nucleic Acids Research* (2018).
- [24] Langmead, B. & Salzberg, S. L. Fast gapped-read alignment with Bowtie 2. *Nature Methods* (2012).
- [25] Li, H. Minimap2: pairwise alignment for nucleotide sequences. *Bioinformatics* **34**, 3094–3100 (2018).
- [26] Wang, O. e. a. Efficient and unique cobarcodeing of second-generation sequencing reads from long dna molecules enabling cost-effective and accurate sequencing, haplotyping, and de novo assembly. *Genome research* **5**, 798–808 (2019).
- [27] Zook, J. e. a. Reproducible integration of multiple sequencing datasets to form high-confidence snp, indel, and reference calls for five human genome reference materials (2018). URL <https://www.biorxiv.org/content/10.1101/281006v2.full>.



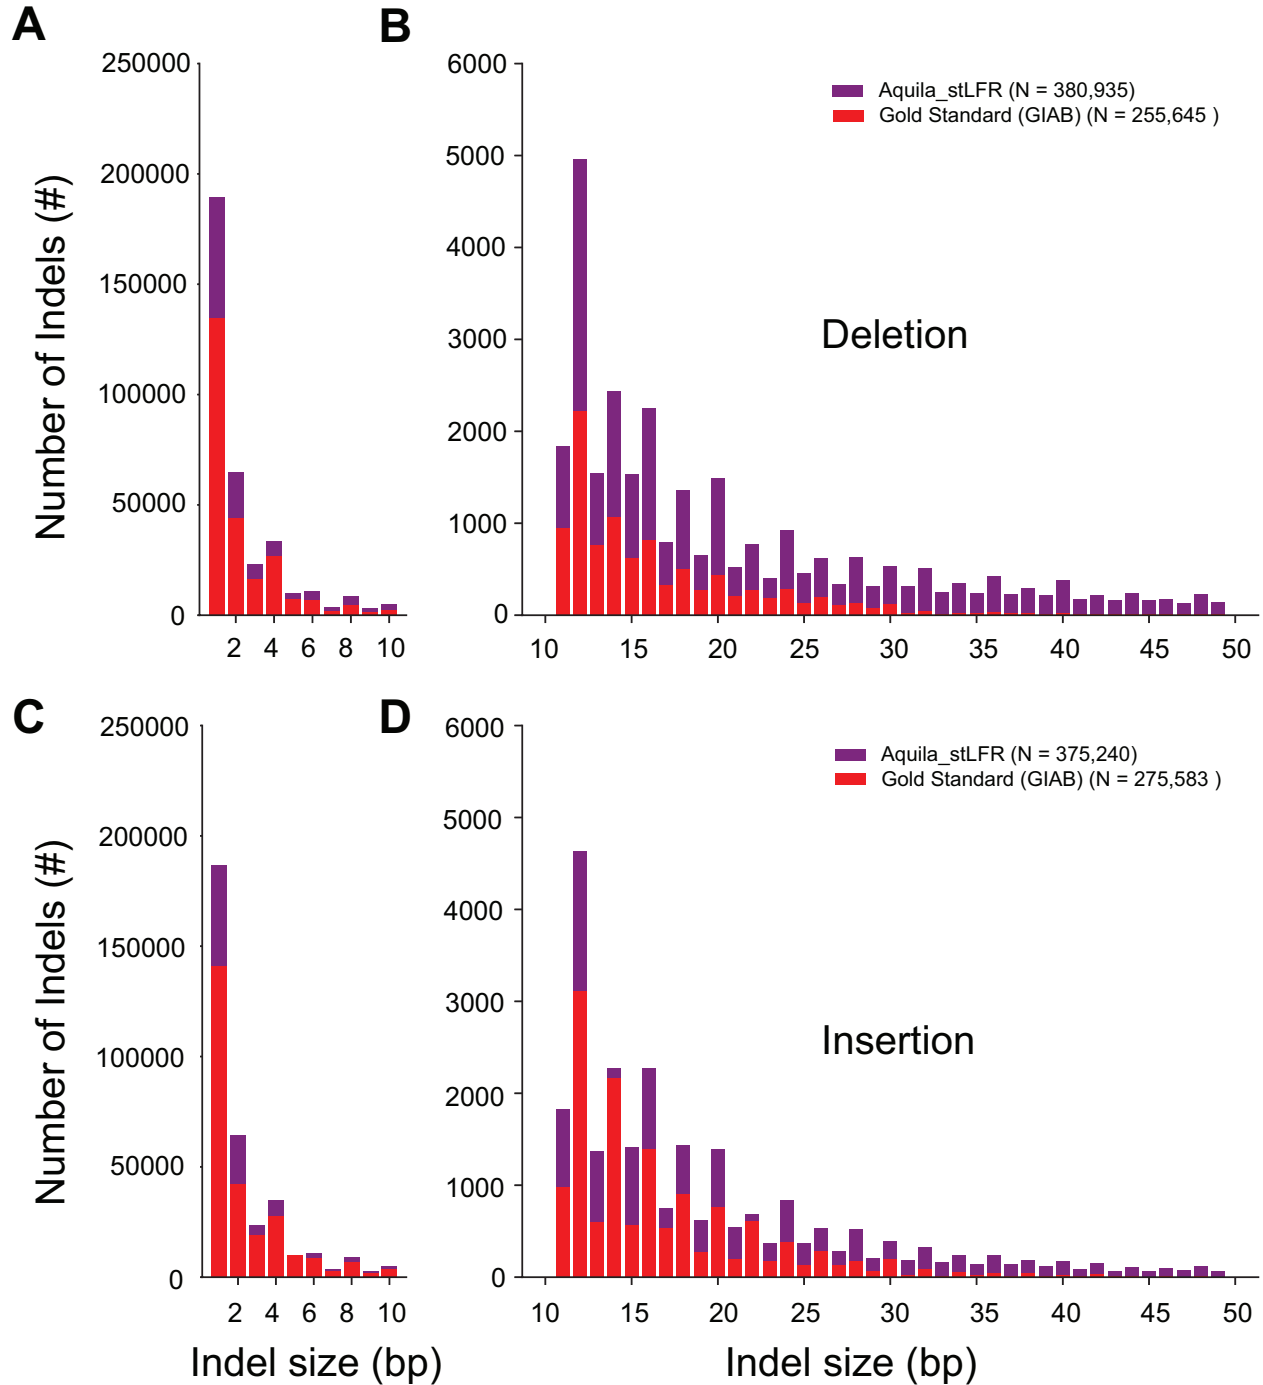

Figure S3: Small indel size distribution of NA12878 for L2 (purple plus red), with the distribution for GiaB benchmark in red only for comparison. A, deletions ( $\leq 10$ bp); B, deletions ( $> 10$ bp and  $< 50$ bp); C, insertions ( $\leq 10$ bp); D, insertions ( $> 10$ bp and  $< 50$ bp).

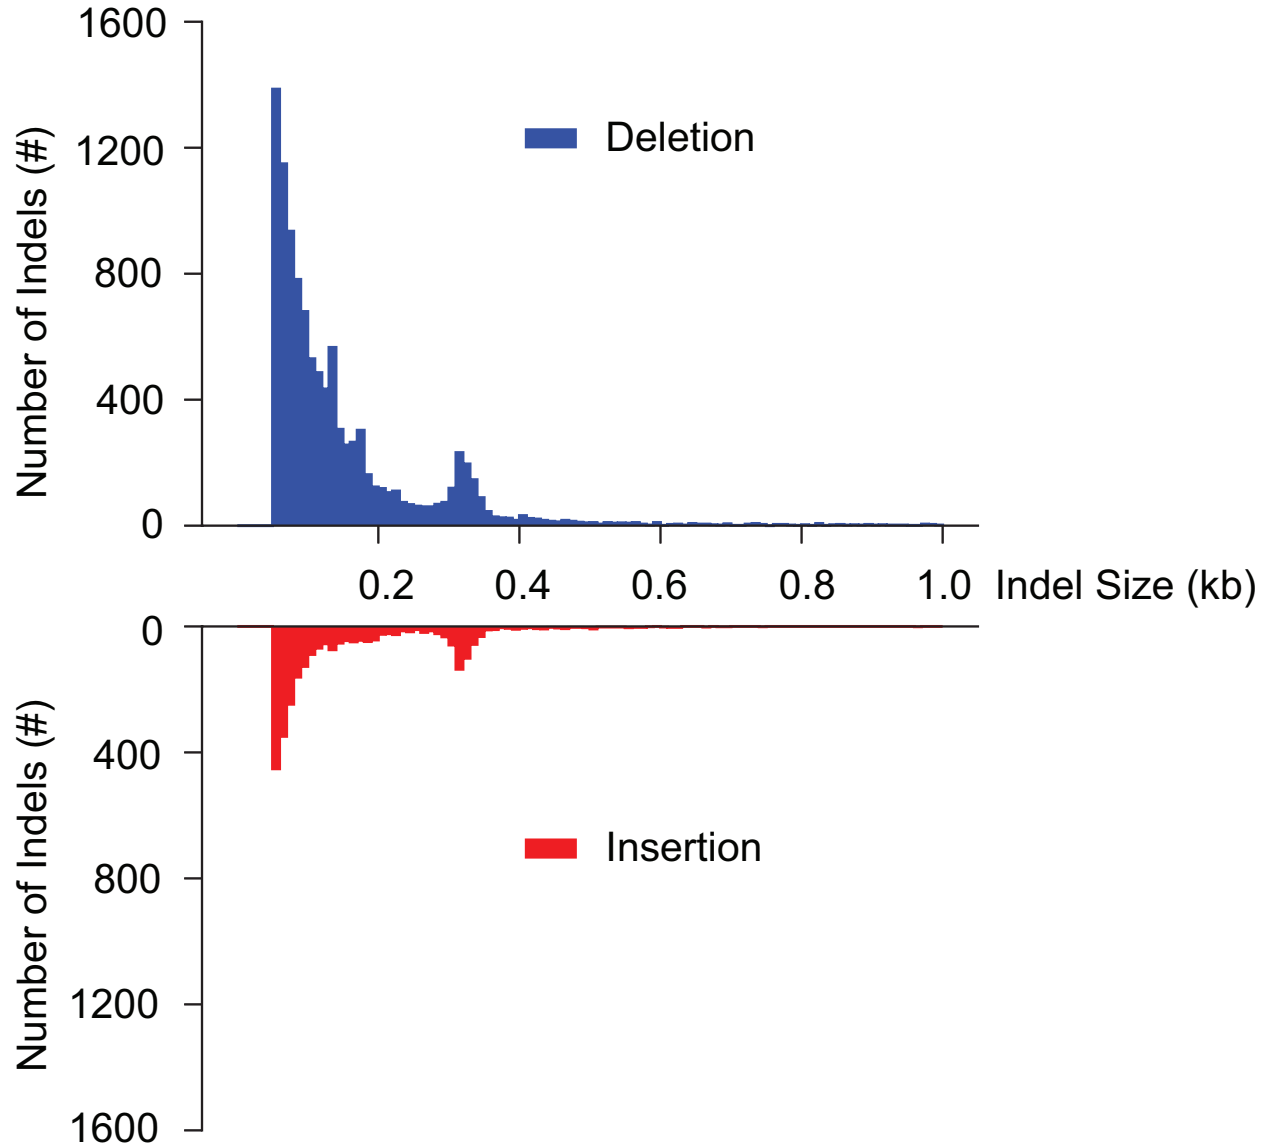

Figure S4: Histogram of SVs ( $\geq 50$ bp) distribution of NA12878 for L2 (only display SVs in window 50bp - 1kb).

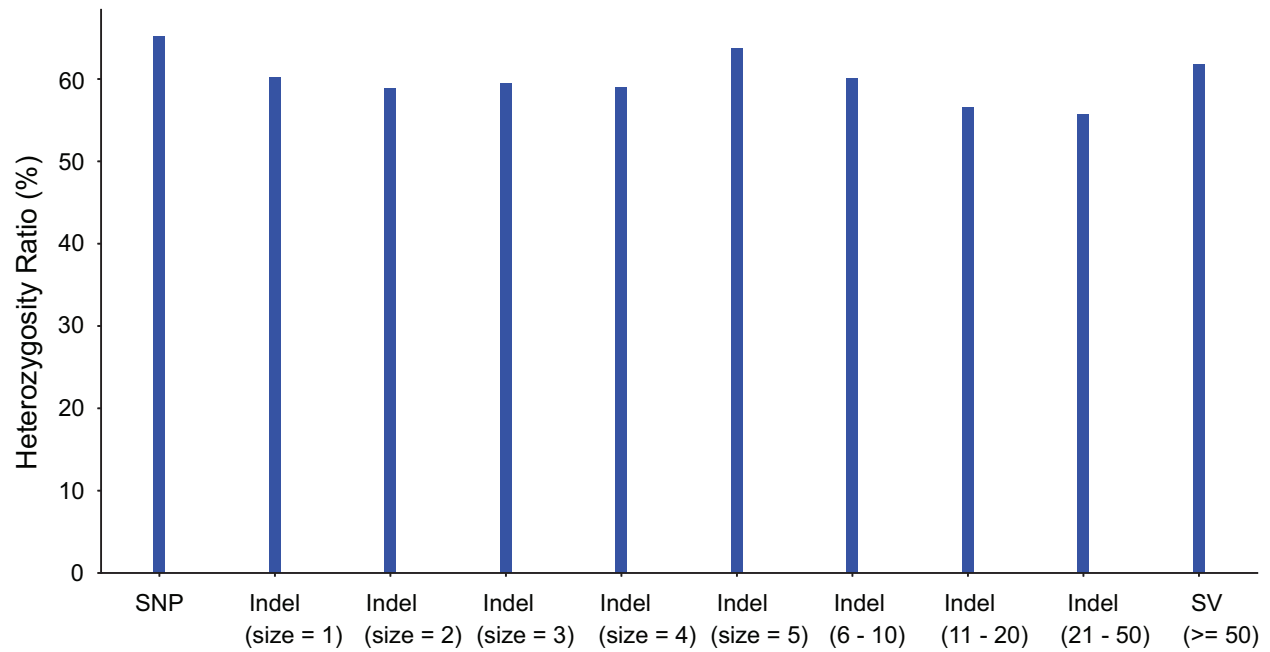

Figure S5: Average heterozygosity of all types and sizes of discovered variants of L2. It notes that the fraction of variants that are heterozygous varies over a narrow range across all types and sizes of detected variation, revealing no obvious biases.

| Library                | Homo         | Homo      | Hetero       | Hetero    | Total        | Total     |
|------------------------|--------------|-----------|--------------|-----------|--------------|-----------|
|                        | Aquila_stLFR | FreeBayes | Aquila_stLFR | FreeBayes | Aquila_stLFR | FreeBayes |
| <b>L1_stLFR</b>        | 1,321,799    | 1,477,019 | 2,560,457    | 2,383,142 | 3,882,256    | 3,860,161 |
| <b>L2_stLFR</b>        | 1,317,395    | 1,476,985 | 2,564,934    | 2,383,139 | 3,882,329    | 3,860,124 |
| <b>L1_10x+L2_stLFR</b> | 1,456,867    | 1,477,019 | 2,331,971    | 2,383,142 | 3,788,838    | 3,860,161 |
| <b>L3_10x+L2_stLFR</b> | 1,468,706    | 1,476,985 | 2,462,376    | 2,383,139 | 3,931,082    | 3,860,124 |

Table S1: Comparison of the number of SNPs calls for four assemblies, using pairwise contig-to-reference alignment by Aquila\_stLFR versus FreeBayes calls. Homo = homozygous, Hetero = heterozygous.

| Library                | Deletions |         |         | Insertions |         |         |
|------------------------|-----------|---------|---------|------------|---------|---------|
|                        | Homo      | Hetero  | Total   | Homo       | Hetero  | Total   |
| <b>L1_stLFR</b>        | 110,290   | 376,093 | 486,383 | 107,046    | 316,339 | 423,385 |
| <b>L2_stLFR</b>        | 110,052   | 376,641 | 486,693 | 106,773    | 316,476 | 423,249 |
| <b>L1_10x+L2_stLFR</b> | 127,910   | 364,455 | 492,365 | 125,025    | 341,881 | 466,906 |
| <b>L3_10x+L2_stLFR</b> | 139,663   | 368,574 | 508,237 | 136,709    | 338,351 | 475,060 |

Table S2: Number of Aquila\_stLFR assembly-based small indel calls (<50bp) for four assemblies. Deletions: homozygous ones, heterozygous ones and total number. Insertions: homozygous ones, heterozygous ones and total number.

|                        | DEL(<50) |         |         | INS(<50) |         |         |
|------------------------|----------|---------|---------|----------|---------|---------|
|                        | Total    | Overlap | Unique  | Total    | Overlap | Unique  |
| <b>L2_stLFR</b>        | 486,693  |         | 74,678  | 423,249  |         | 71,849  |
| <b>L3_10x</b>          | 517,343  | 412,015 | 105,328 | 489,970  | 351,400 | 138,570 |
| <b>L3_10x</b>          | 517,343  |         | 35,392  | 489,970  |         | 50,897  |
| <b>L3_10x+L2_stLFR</b> | 508,237  | 481,951 | 26,286  | 475,060  | 439,073 | 35,987  |
| <b>L2_stLFR</b>        | 486,693  |         | 69,120  | 423,249  |         | 64,609  |
| <b>L3_10x+L2_stLFR</b> | 508,237  | 417,573 | 90,664  | 475,060  | 358,640 | 116,420 |

Table S3: Overlapped and unique number of small indels (<50bp) among L2\_stLFR, L3\_10x, and L3\_10x+L2\_stLFR. For overlapped small indels between two libraries, the break points and reference and alternate alleles are the same.
