## Genome Analysis

# Aquila\_stLFR: diploid genome assembly based structural variant calling package for stLFR linked-read

Yichen Henry Liu<sup>1</sup>, Griffin L. Grubbs<sup>2</sup>, Lu Zhang<sup>3</sup>, Xiaodong Fang<sup>4</sup>, David L. Dill<sup>5</sup>, Arend Sidow<sup>6</sup>, and Xin Zhou<sup>1, 2, 7\*</sup>

<sup>1</sup>Department of Computer Science, Vanderbilt University, Nashville, TN 37235, USA, <sup>2</sup>Department of Biomedical Engineering, Vanderbilt University, Nashville, TN 37235, USA, <sup>3</sup>Department of Computer Science, Hong Kong Baptist University, Kowloon Tong, Hong Kong, <sup>4</sup>BGI Tech, BGI Genomics, Shenzhen, China, <sup>5</sup>Department of Computer Science, Stanford University, Stanford, CA 94305, USA, <sup>6</sup>Department of Pathology, Stanford University, Stanford, CA 94305, USA, <sup>7</sup>Data Science Institute, Vanderbilt University, Nashville, TN 37235, USA.

\*To whom correspondence should be addressed.

Associate Editor: XXXXXXXX

Received on XXXXX; revised on XXXXX; accepted on XXXXX

## Abstract

**Motivation:** Identifying structural variants (SVs) is of critical importance in health and disease, however, detecting them remains a scientific and computing challenge. Several linked-read sequencing technologies, including 10X linked-read, TELL-Seq, and single tube long fragment read (stLFR), have been recently developed as cost-effective approaches to reconstruct multi-megabase haplotypes (phase blocks) from sequence data of a single sample. These technologies provide an optimal sequencing platform to characterize SVs, though few computational algorithms can utilize them. Thus, we developed Aquila\_stLFR, an approach that resolves SVs through haplotype-based assembly of stLFR linked-reads.

**Results:** Aquila\_stLFR first partitions LFRs into two haplotype-specific blocks, by taking advantage of the potential phasing ability of the linked-read itself. Each haplotype is then assembled independently, to achieve a complete diploid assembly to finally reconstruct the genome-wide SVs. We benchmarked Aquila\_stLFR on a well-studied sample, NA24385, and showed Aquila\_stLFR can detect medium to large size (50bp - 10kb) deletions with a high sensitivity and insertions with a high specificity.

**Availability:** Source code and documentation are available on [https://github.com/maizix/Aquila\\_stLFR](https://github.com/maizix/Aquila_stLFR).

**Contact:** [maizie.zhou@vanderbilt.edu](mailto:maizie.zhou@vanderbilt.edu)

**Supplementary information:** Supplementary data are available at *Bioinformatics* online.

## 1 Introduction

Generating a precise and customized diploid human genome for each individual will be a breakthrough for uncovering the fundamental relationship between genotype and phenotype, having far reaching health implications, e.g. in cancer-related variants and risk for genetic disease (Tewhey *et al.*, 2011). Illumina short-read sequencing has had a major influence on human genetic studies. Over 100,000 individual genomes have been sequenced, allowing detection of unique, disease-causing

variations in personal genomes (Lunshof *et al.*, 2010). Large-scale genome studies, such as the 1000 Genome Project and the 10k UK Genome Project, have relied on reference-based alignment approaches, making great progress in uncovering genomic differences among individuals. However, identifying individual variations in highly variable or repetitive regions has been less accurate due to limitations of the resequencing technology (Sohn *et al.*, 2018). Structural variants (SVs  $\geq$  50bp), which have shown a significant phenotypic impact by disrupting gene function and regulation, are also challenging to detect through short reads by reference-based alignment algorithms. *De novo* assembly is a better alternative for building a precise diploid genome on a large scale to identify

SVs from haploid assemblies. To date, different assembly-based methods have been developed to offer a powerful approach to identify SVs (Wala *et al.*, 2018; Fan *et al.*, 2017; Nattestad *et al.*, 2016), even though the breakpoints of large variants are less likely to be spanned through short reads.

The recently developed 10X linked-read, TELL-Seq, and single tube long fragment read (stLFR) sequencing technologies offer cost-effective solutions for large-scale “perfect genome” assembly (Peters *et al.*, 2014; Zheng *et al.*, 2016; McElwain *et al.*, 2017) that enable optimal sequencing platforms to better characterize SVs than short reads. Compared to short-read and long-read technologies, these linked-read technologies combine low sequencing error and long-range contiguity. stLFR enables co-barcoding of over 8 million 20 - 300 kb genomic DNA fragments, and these long-range fragments enable efficient phasing of variants, resulting in long phase block N50 (34MB for NA12878, Wang *et al.*, 2019). The long-range information of 10X linked-read allows detection of SVs, *de novo* mutations, and haplotype phasing much easier and accurately (Zheng *et al.*, 2016; Zhou *et al.*, 2018). Taking full advantage of these linked-read data to generate a diploid assembly and detect SVs requires development of new algorithms. Supernova was introduced by 10X Genomics to assemble 10X linked-read sequencing data (Weisenfeld *et al.*, 2017), though its performance has limitations in identifying SVs from diploid assembly (Zhang *et al.*, 2019, 2020; Zhou *et al.*, 2021). Another software, Aquila, was developed recently to solve this problem for 10X linked-reads by achieving diploid assemblies and reconstructing genome-wide SVs with high sensitivity and accuracy (Zhou *et al.*, 2021). Here, we develop Aquila\_stLFR, which extends Aquila to adapt to the key characteristics of stLFR to identify SVs from diploid assembly with a higher accuracy compared with other state-of-the-art methods. Furthermore, we introduce a hybrid assembly mode, “Aquila\_hybrid”, to enable combining of both stLFR and 10X linked-read data.

## 2 Methods

Aquila\_stLFR is a reference-assisted, local *de novo* assembly pipeline (Supplementary Figure 1). The reference is used to allocate long fragment reads (LFRs) into haplotype-specific blocks, and local assembly is then performed within small chunks independently for both haplotype-specific blocks. The input files for Aquila\_stLFR are a FASTQ file with paired short reads, a BAM file, and a VCF file (by FreeBayes, Garrison *et al.*, 2012). To generate the BAM file through BWA-MEM (Li *et al.*, 2009), each sequence identifier line in the FASTQ file needs to contain the barcode identifier, starting with “BX:Z:” (for instance, “BX:Z:540\_839\_548” where 540\_839\_548 is the barcode identifier, Supplementary Figure 2). The BAM file by BWA-MEM will then also include the extra field “BX:Z:” for Aquila\_stLFR to reconstruct LFRs (Supplementary Figure 3). Ideally, each individual LFR is attached to the same unique barcode and sequenced by short-read sequencing, so short reads with the same barcode could be linked together to form the original LFR (linked-read). Aquila\_stLFR reconstructs all LFRs relying on this concept. However, it is still necessary to tackle the barcode deconvolution problem: each group of reads that share the same barcode is drawn from an unobserved set of fragments, since the ideal design of one unique barcode per LFR will not be achieved for all LFRs during preparation of real sequencing libraries. Aquila\_stLFR applies an empirical boundary threshold (50kb) to differentiate between two LFRs with the same barcode. For instance, if the distance between two successive reads with the same barcode is larger than 50kb, they will be assumed to be drawn from two different LFRs.

After reconstructing all LFRs, Aquila\_stLFR applies a recursive clustering algorithm to partition LFRs into haplotype-specific blocks (Zhou *et al.*, 2021). Aquila\_stLFR further cuts large haplotype-specific

Table 1. Genome-wide deletion evaluation against GIAB NA24385 benchmark.

|        |                | Aquila_stLFR | GROC-SVs | NAIBR |
|--------|----------------|--------------|----------|-------|
| 50~1k  | Benchmark      | 3671         |          |       |
|        | Total call     | 11,495       | 0        | 10    |
|        | True Positive  | 2,954        | 0        | 0     |
|        | False Positive | 8,541        | 0        | 10    |
|        | False Negative | 717          | 3,584    | 3,584 |
|        | Precision      | 25.7%        | NAN      | NAN   |
|        | Recall         | 80.5%        | 0%       | 0%    |
| 1k~10k | Benchmark      | 499          |          |       |
|        | Total call     | 602          | 0        | 157   |
|        | True Positive  | 317          | 0        | 119   |
|        | False Positive | 285          | 0        | 38    |
|        | False Negative | 182          | 499      | 380   |
|        | Precision      | 52.7%        | NAN      | 75.8% |
|        | Recall         | 63.5%        | 0%       | 23.8% |
| >10k   | Benchmark      | 29           |          |       |
|        | Total call     | 105          | 35       | 218   |
|        | True Positive  | 6            | 6        | 24    |
|        | False Positive | 99           | 29       | 194   |
|        | False Negative | 23           | 23       | 5     |
|        | Precision      | 5.7%         | 17.1%    | 11.0% |
|        | Recall         | 20.7%        | 20.7%    | 82.8% |

blocks into small chunks (100kb by default). Finally, short reads that are drawn from LFRs are identified and reassembled locally by SPAdes (Bankevich *et al.*, 2012) within each small chunk. To achieve large contiguity, Aquila\_stLFR iteratively concatenates assembled mini-contigs from small chunks into full-length contigs. To detect SVs from diploid assembly, Aquila\_stLFR performs a pairwise comparison between haploid contigs and reference by integrating Minimap2 (Li, 2018) and paf tools (<https://github.com/lh3/minimap2/tree/master/misc>). Additionally, the “Aquila\_hybrid” mode applies an analogous concept to reconstruct long DNA fragments and generate the same data structure for long DNA fragments of both 10X and stLFR data (Supplementary Figure 1). Aquila\_hybrid can combine both linked-read data for diploid assembly.

## 3 Results and Discussion

In this study, we used the stLFR sequencing library for NA24385 from the Genome in A Bottle (GIAB) website ([ftp://ftp-trace.ncbi.nlm.nih.gov/giab/ftp/data/AshkenazimTrio/HG002\\_NA24385\\_son/stLFR/](ftp://ftp-trace.ncbi.nlm.nih.gov/giab/ftp/data/AshkenazimTrio/HG002_NA24385_son/stLFR/)), since we can evaluate SV ( $\geq 50$ bp) detection by comparing Aquila\_stLFR’s calls against the GIAB NA24385 SV benchmark callsets. This stLFR library has approximately 100x Illumina sequencing coverage, and the average inferred (reconstructed) DNA fragment (LFR) lengths are around 26kb. To demonstrate the performance of SV calling for Aquila\_stLFR, we have compared it against two other linked-reads SV callers: GROC-SVs and NAIBR (Table 1). After generating SV calls for NA24385 from all three methods, we used Truvari (parameters -p 0.1, -P 0.1, -r 200, -passonly) to compare SV calls with the benchmark callset from three different SV size range thresholds. In table 1, we show that Aquila\_stLFR achieved a higher sensitivity than the other two methods of 80.5% for deletions SV  $\in$  [50bp, 1kb] and 63.5% for deletions SV  $\in$  [1kb, 10kb]. NAIBR achieved a higher sensitivity of 82.8% for deletions (SV > 10kb). Since few insertions were found by GROC-SVs and NAIBR, we only performed insertion evaluation for Aquila\_stLFR. Aquila\_stLFR achieved a high specificity of 83.8% with a sensitivity of 23.4% for insertions SV  $\in$  [50bp, 1kb]. In conclusion, Aquila\_stLFR is the first approach that effectively leverages

the strengths of linked-reads/Illumina sequencing to enable medium to large SV discovery.

Our study also provides a guideline for future stLFR library preparation to achieve significant improvement in assembly and SV detection. Recent studies with different customized 10X linked-reads libraries showed that the optimal physical coverage  $C_F$  was between 332X and 823X. They also suggested that the optimal length-weighted fragment length ( $\mu_{FL}$ ) was around 50 - 150kb (Zhang *et al.*, 2019, 2020). We found that the stLFR library had a configuration of these three parameters ( $C_F = 238X$ ,  $C_R = 0.35$ ,  $\mu_{FL} = 26\text{kb}$ ). The relatively low  $\mu_{FL}$  was one key cause of the lower contiguity of stLFR assemblies compared with that of 10X linked-reads assemblies, which then influenced SV calling. Furthermore, the stLFR library used 100bp paired short reads which created a limitation for local assembly compared to the 150bp paired short reads used by 10X linked-reads. Future studies may take advantage of the tools and analysis we present here.

### Acknowledgements

This research was supported by Vanderbilt University Development Funds (FF\_300033), the Joint Initiative for Metrology in Biology (JIMB; National Institute of Standards and Technology) and Research Grant Council Early Career Scheme (HKBU 22201419).

### References

- Bankevich, A. *et al.* (2012). Spades: A new genome assembly algorithm and its applications to single-cell sequencing. *Journal of Computational Biology*, **19**(5), 455–477.
- Fan, X. *et al.* (2017). HySA: A hybrid structural variant assembly approach using next-generation and single-molecule sequencing technologies. *Genome Research*, **27**(5), 793–800.
- Garrison, E. *et al.* (2012). Haplotype-based variant detection from short-read sequencing. *arXiv preprint arXiv:1207.3907*.
- Li, H. (2018). Minimap2: pairwise alignment for nucleotide sequences. *Bioinformatics*, **34**(18), 3094–3100.
- Li, H. *et al.* (2009). Fast and accurate short read alignment with burrows-wheeler transform. *Bioinformatics*, **25**(14), 1754–1760.
- Lunshof, J. *et al.* (2010). Personal genomes in progress: from the human genome project to the personal genome project. *Dialogues Clin Neurosci*, **12**(1), 47–60.
- McElwain, M. A. *et al.* (2017). Long fragment read (lfr) technology: Cost-effective, high-quality genome-wide molecular haplotyping. *Methods Mol. Biol.*, **1551**, 191–205.
- Nattestad, M. *et al.* (2016). Assemblytics: A web analytics tool for the detection of variants from an assembly. *Bioinformatics*, **32**(19), 3021–3023.
- Peters, B. *et al.* (2014). Co-barcoded sequence reads from long dna fragments: a cost-effective solution for perfect genome sequencing. *Front Genet*, **5**, 466.
- Sohn, J. I. *et al.* (2018). The present and future of de novo whole-genome assembly. *Briefings in Bioinformatics*, **19**(1), 23–40.
- Tewhey, R. *et al.* (2011). The importance of phase information for human genomics. *Nature reviews. Genetics*, **12**, 215–233.
- Wala, J. A. *et al.* (2018). SvABA: Genome-wide detection of structural variants and indels by local assembly. *Genome Research*, **28**(4), 581–591.
- Wang, O. *et al.* (2019). Efficient and unique cobarcodeing of second-generation sequencing reads from long dna molecules enabling cost-effective and accurate sequencing, haplotyping, and de novo assembly. *Genome research*, **29**(5), 798–808.
- Weisenfeld, I. *et al.* (2017). Direct determination of diploid genome sequences. *Genome research*, **5**, 757–767.
- Zhang, L. *et al.* (2019). Assessment of human diploid genome assembly with 10x Linked-Reads data. *GigaScience*, **8**(11).
- Zhang, L. *et al.* (2020). De novo diploid genome assembly for genome-wide structural variant detection. *NAR Genomics and Bioinformatics*, **2**(1).
- Zheng, G. X. *et al.* (2016). Haplotyping germline and cancer genomes with high-throughput linked-read sequencing. *Nature Biotechnology*, **34**(3), 303–311.
- Zhou, X. *et al.* (2021). Aquila: diploid personal genome assembly and comprehensive variant detection based on linked reads. *Nature Communications*. in press.
- Zhou, X. *et al.* (2018). HAPDeNovo: A haplotype-based approach for filtering and phasing de novo mutations in linked read sequencing data. *BMC Genomics*, **19**(1).
